# Supplementary material for: ZnS spheres wrapped by an ultrathin wrinkled carbon film as a multifunctional interlayer for long-life Li–S batteries
Source: Royal Society of Chemistry journal article supplement (doi:10.1039/c9ta10560c), 2019-11-09
Supplement: c9ta10560c1.pdf [file c9ta10560c1.pdf]

## Supporting Information

### **ZnS Spheres Wrapped by Ultrathin Wrinkled Carbon film as Multifunctional Interlayer for Long-life Li-S Batteries**

Jin-Lin Yang<sup>a,b</sup>, Shi-Xi Zhao<sup>a\*</sup>, Yi-Ming Lu<sup>a,b</sup>, Xiang-Tian Zeng<sup>a,b</sup>, Wei Lv<sup>a</sup> and Guo-Zhong Cao<sup>c\*</sup>

<sup>a</sup> Tsinghua Shenzhen International Graduate School, Tsinghua University, Shenzhen, 518055, China.

<sup>b</sup> School of Materials Science and Engineering, Tsinghua University, Beijing, 100084, China.

<sup>c</sup> Department of Materials Science and Engineering, University of Washington, Seattle, WA 98195, USA.

\*Corresponding author: Email: [zhaosx@sz.tsinghua.edu.cn](mailto:zhaosx@sz.tsinghua.edu.cn) (S.X.Zhao); E-mail: [gzcao@uw.edu](mailto:gzcao@uw.edu)

## Supplementary Figures

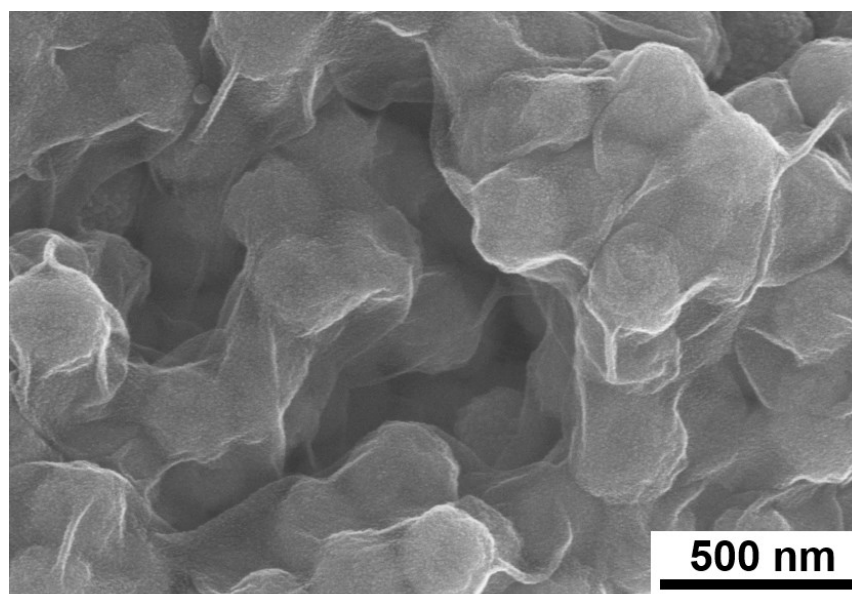

**Figure S1.** SEM image of ZnS@WCF

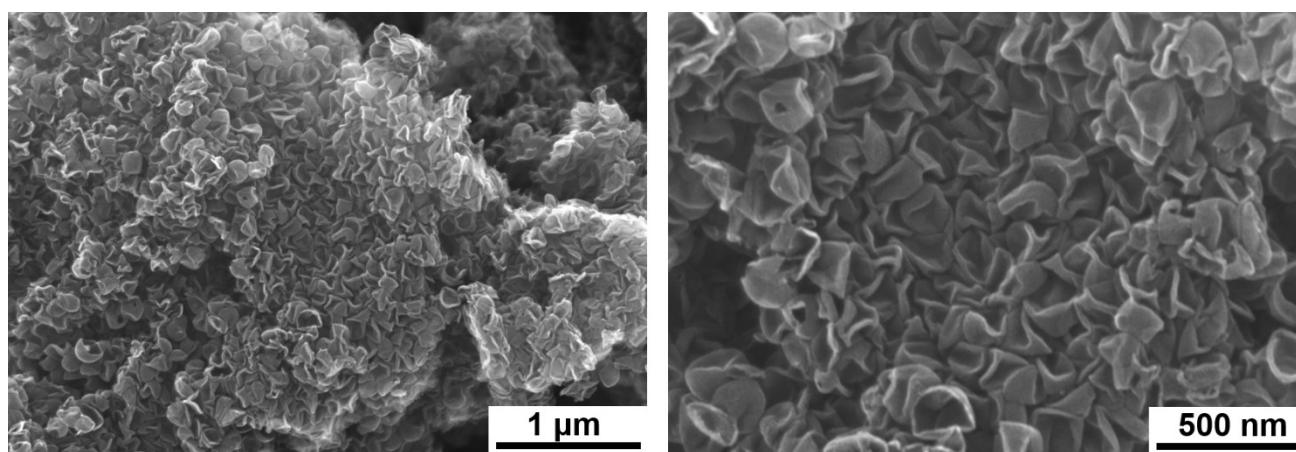

**Figure S2.** SEM images of pure WCF

**Table S1.** Synthesis details of ZnS@WCF.

| Samples        | RF (g/ml)                                                                           | TPOS (ml) | NH <sub>3</sub> ·H <sub>2</sub> O | Water/ethanol (ml/ml) |
|----------------|-------------------------------------------------------------------------------------|-----------|-----------------------------------|-----------------------|
| <b>A</b>       | 0.10-0.14                                                                           | 2.5       | 3                                 | 10/70                 |
| <b>B</b>       | 0.05-0.07                                                                           | 2.5       | 3                                 | 10/70                 |
| <b>C</b>       | 0.0125-0.0175                                                                       | 2.5       | 3                                 | 10/70                 |
| <b>D</b>       | 0.025-0.035                                                                         | 5         | 3                                 | 10/70                 |
| <b>E</b>       | 0.025-0.035                                                                         | 1.25      | 3                                 | 10/70                 |
| <b>F</b>       | 0.025-0.035                                                                         | 2.5       | 3                                 | 20/60                 |
| <b>G</b>       | 0.025-0.035                                                                         | 2.5       | 1.5                               | 10/70                 |
| <b>H</b>       | 0.025-0.035                                                                         | 2.5       | 6                                 | 10/70                 |
| <b>I</b>       | 0.025-0.035                                                                         | 2.5       | 12                                | 10/70                 |
| <b>J</b>       | Same to the synthesis process of ZnS@WCF, but TPOS and RF were added simultaneously |           |                                   |                       |
| <b>ZnS@WCF</b> | 0.025-0.035                                                                         | 2.5       | 3                                 | 10/70                 |

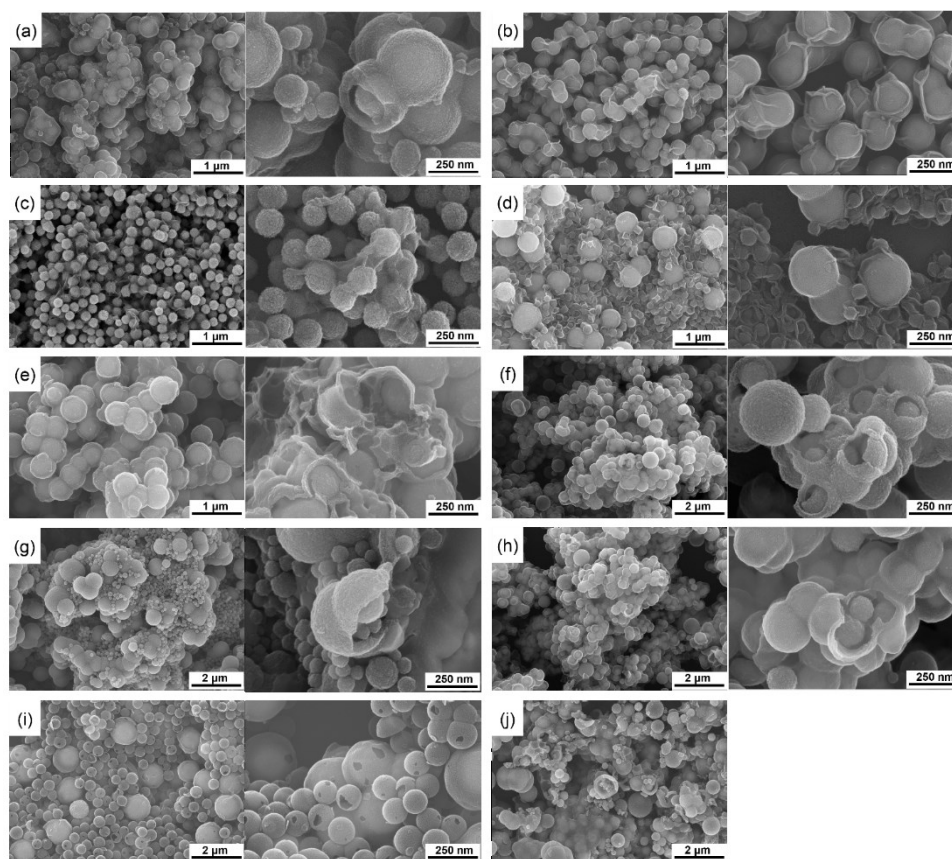

**Figure S3.** SEM images of different samples fabricated throughout the process mentioned in Table S2. (a)-(j) are corresponded to the sample A-J respectively.

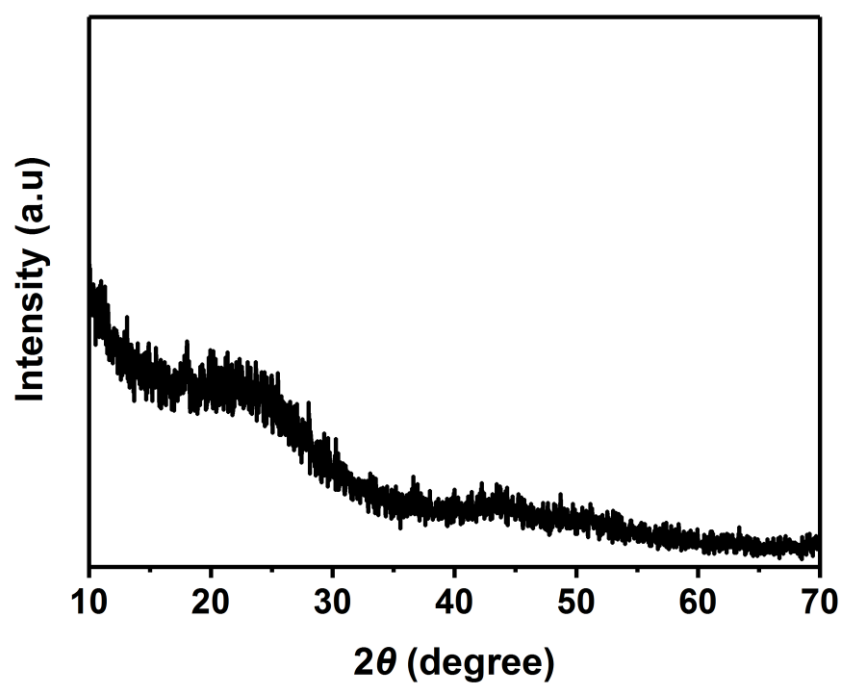

**Figure S4.** XRD pattern of the pure WCF sample.

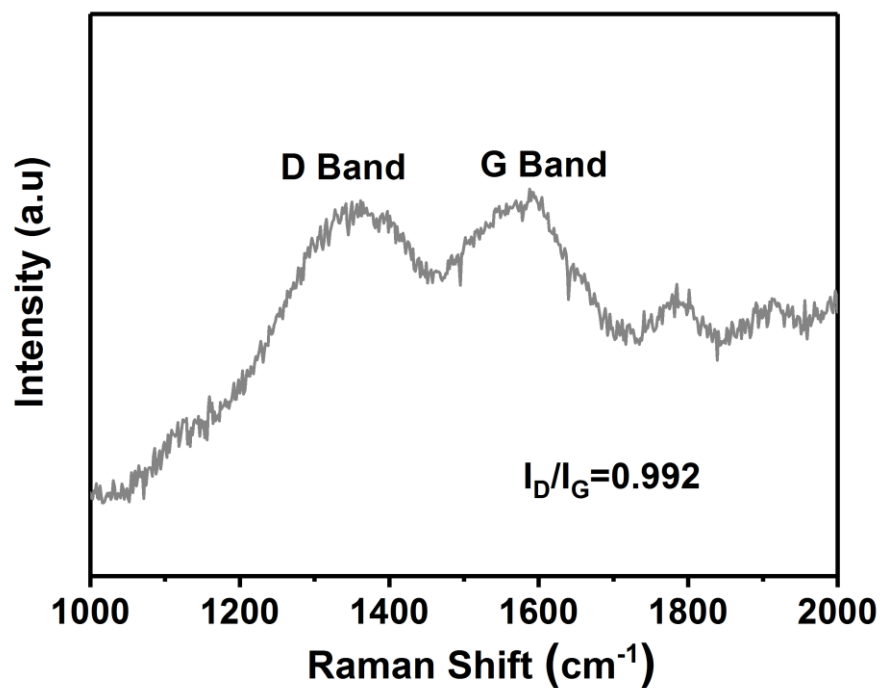

Figure S5. Raman spectra of ZnS@WCF

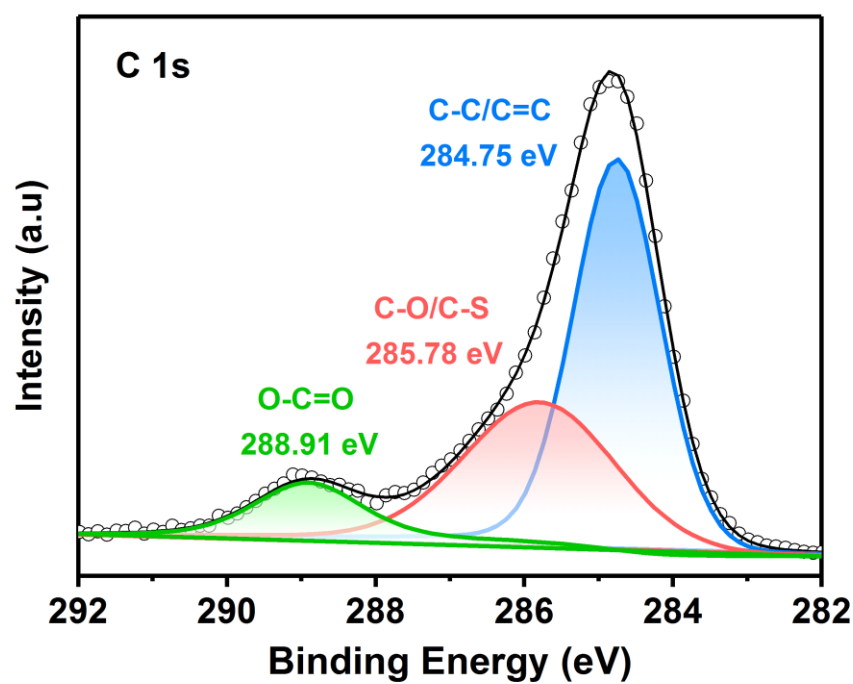

Figure S6. High resolution XPS spectra of C 1s in ZnS@WCF

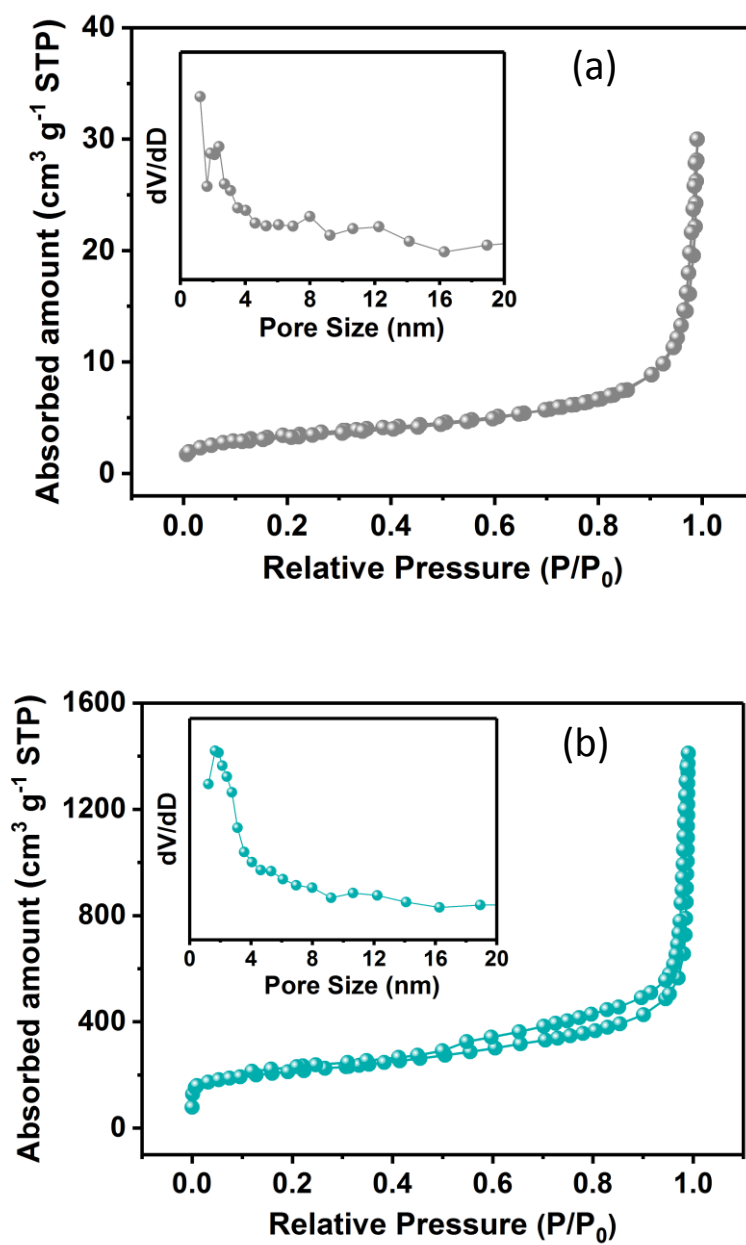

**Figure S7.** N<sub>2</sub> sorption isotherms and pore distribution of (a) ZnS nanospheres and (b) WCF

**Table S2.**  $S_{\text{BET}}$  and  $V_{\text{P}}$  values of samples.

| Samples                                           | ZnS nanospheres | WCF    | ZnS@WCF |
|---------------------------------------------------|-----------------|--------|---------|
| $S_{\text{BET}} (\text{m}^2 \cdot \text{g}^{-1})$ | 12.532          | 768.05 | 446.95  |
| $V_{\text{P}} (\text{m}^3 \cdot \text{g}^{-1})$   | 0.0434          | 1.943  | 0.7389  |
| Pore Size (nm)                                    | 1.21            | 1.66   | 1.64    |

Theoretical equations of the current-time transients of four classic electrochemical deposition models (2D instantaneous nucleation and 2D progressive nucleation are based on Bewick, Fleischman, and Thirsk models; 3D instantaneous nucleation and 3D progressive nucleation are based on Scharifker–Hills models).<sup>47</sup>

2DI:

$$\frac{i}{i_m} = \left(\frac{t}{t_m}\right) \left\{ \exp\left[\frac{t^2 - t_m^2}{2t_m^2}\right] \right\} \quad (\text{S1})$$

2DP:

$$\frac{i}{i_m} = \left(\frac{t}{t_m}\right)^2 \left\{ \exp\left[\frac{-2(t^3 - t_m^3)}{3t_m^3}\right] \right\} \quad (\text{S2})$$

3DI:

$$\frac{i}{i_m} = \left(\frac{1.9542}{t/t_m}\right)^{1/2} \left\{ 1 - \exp\left[1.2564\left(\frac{t}{t_m}\right)\right] \right\} \quad (\text{S3})$$

3DP:

$$\frac{i}{i_m} = \left(\frac{1.2254}{t/t_m}\right)^{1/2} \left\{ 1 - \exp\left[2.3367\left(\frac{t}{t_m}\right)^2\right] \right\} \quad (\text{S4})$$

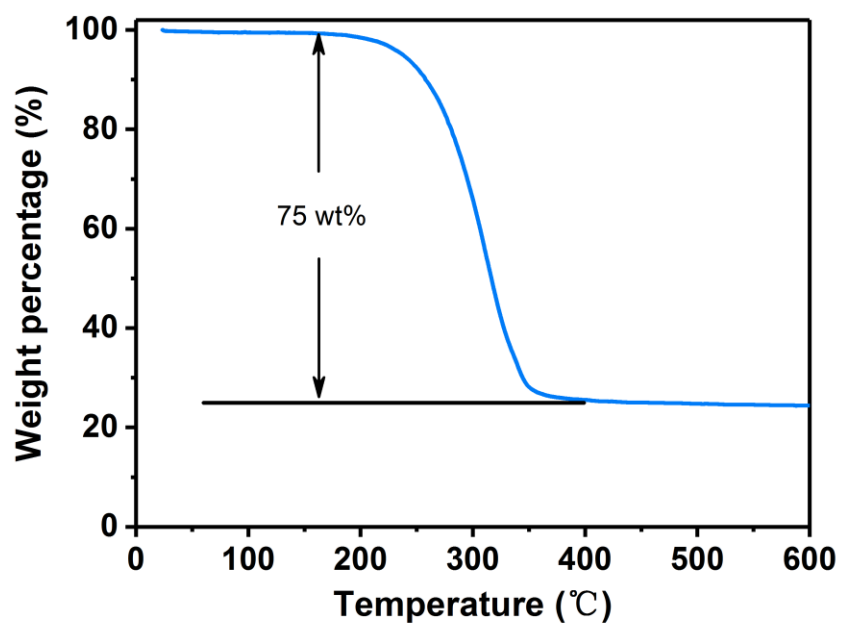

**Figure S8.** TGA curve of CB/S hybrid under  $N_2$  atmosphere.

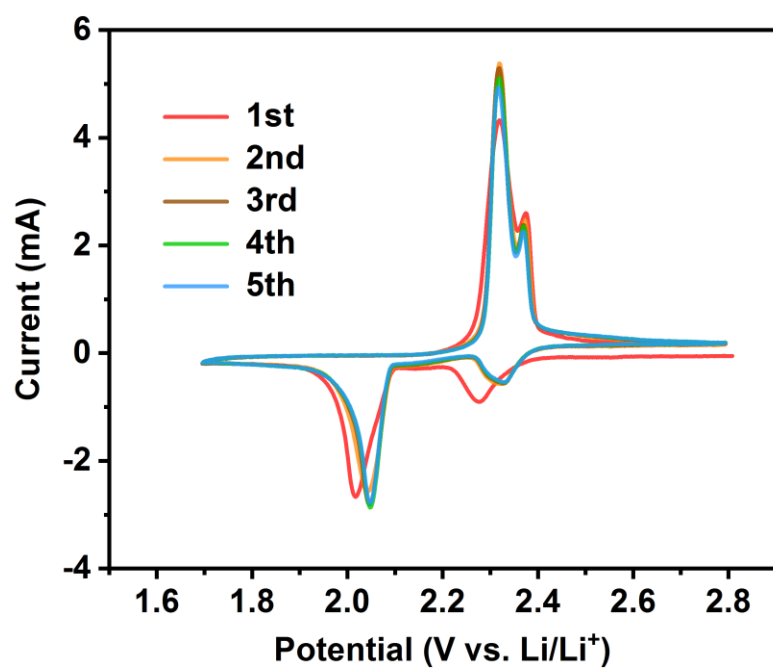

**Figure S9.** The initial five CV curves of LS-ZnS@WCF at a scan rate of  $0.1 \text{ mV} \cdot \text{s}^{-1}$

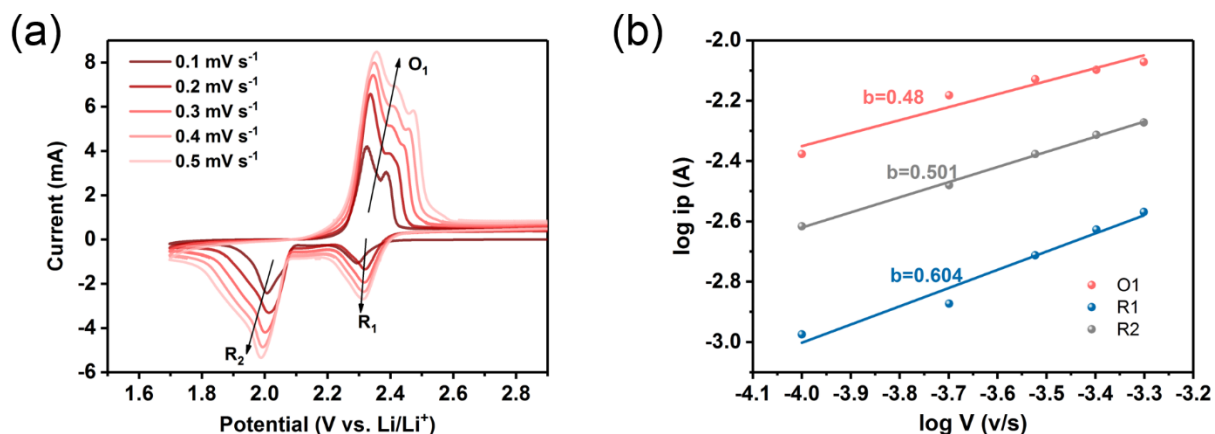

**Figure S10.** (a) CV curves at different scan rates ranging from 0.1 to 5 mV s<sup>-1</sup>; (b) The plots of log ip as a function of

log  $v$ .

As we can see from the CV curves, the polarization and the width of current peaks increased with the scan rate. The power law formulas  $i_p = a \cdot v^b$  and  $\log i_p = \log a + b \log v$  can be employed for the analysis of the CV data obtained.  $i_p$  is the current of the oxidation peak and the reduction peaks (O<sub>1</sub>, R<sub>1</sub> and R<sub>2</sub>).  $v$  represents the scan rate. Two well-defined conditions should be introduced: i)  $b = 1.0$  is representative of surface-capacitive behavior and ii)  $b = 0.5$  suggests a faradaic intercalation process, which is Li<sup>+</sup> diffusion controlled.  $b$  is equal to the slope of plots in the right fig. We found that the values of  $b$  are in the range of 0.48-0.6, indicating the Li<sup>+</sup> diffusion-controlled process during the electrochemical reaction. [S1,S2](#)



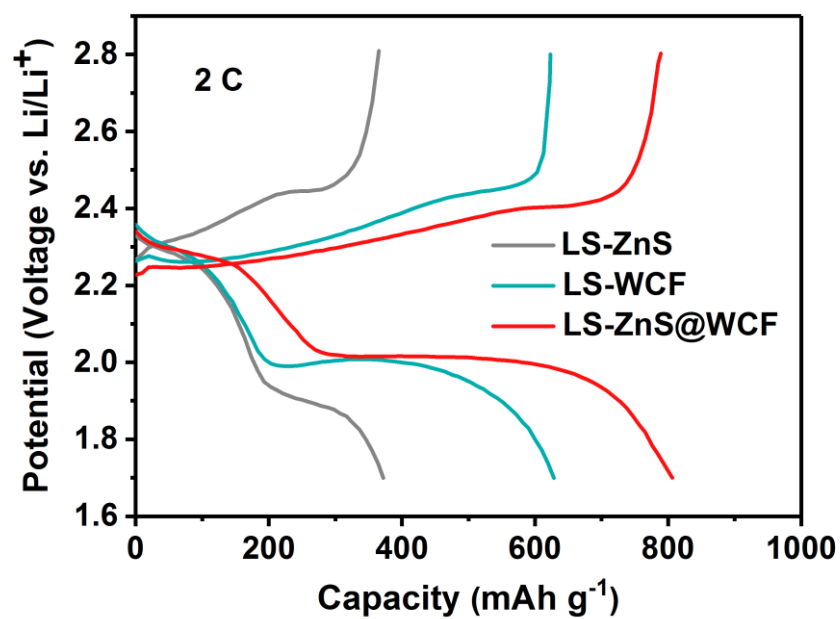

**Figure S11.** Charge-discharge profiles of L-S cells based on different type of interlayers at 2 C.

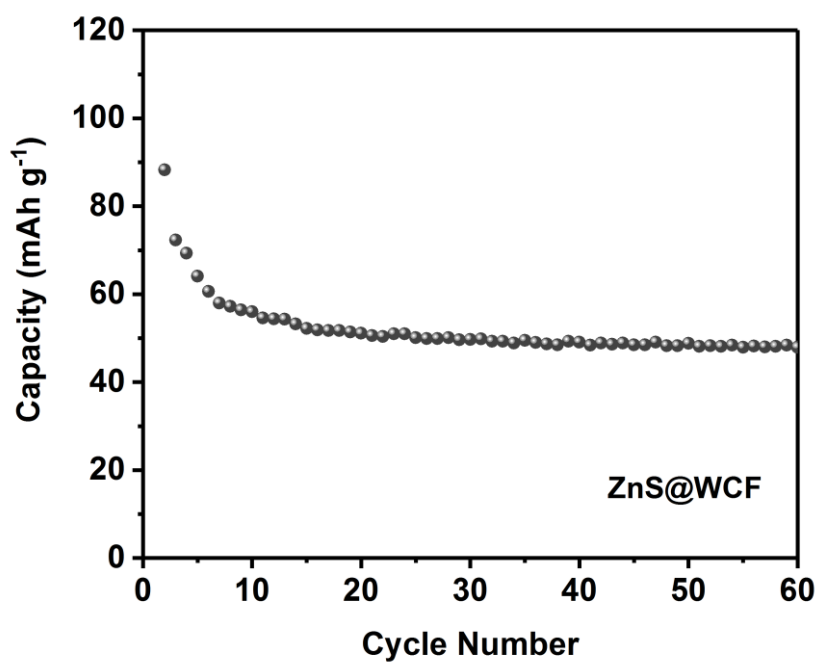

**Figure S12.** Cycling performance of ZnS@WCF hybrid without the addition of CB/S cathode.

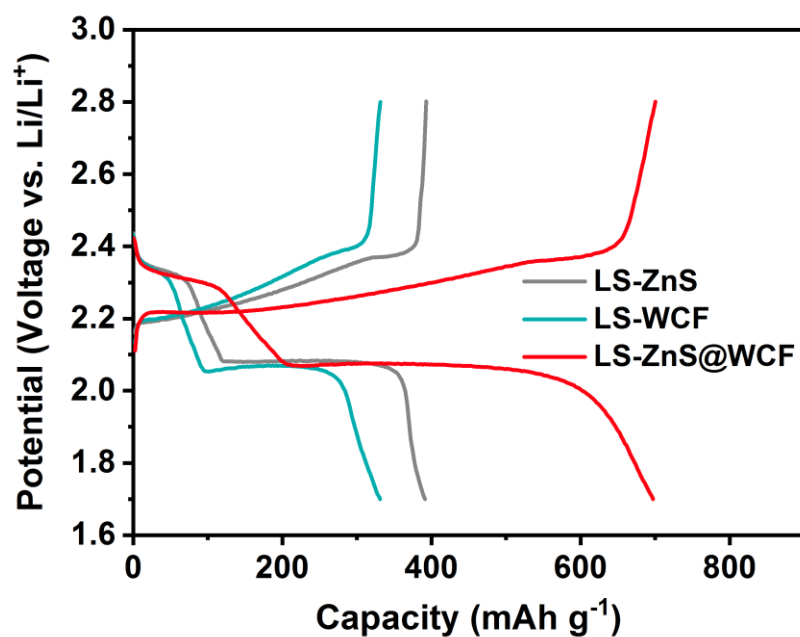

**Figure S13.** Charge-discharge profiles of L-S cells based on different type of interlayers after 300 cycles at 0.5 C.

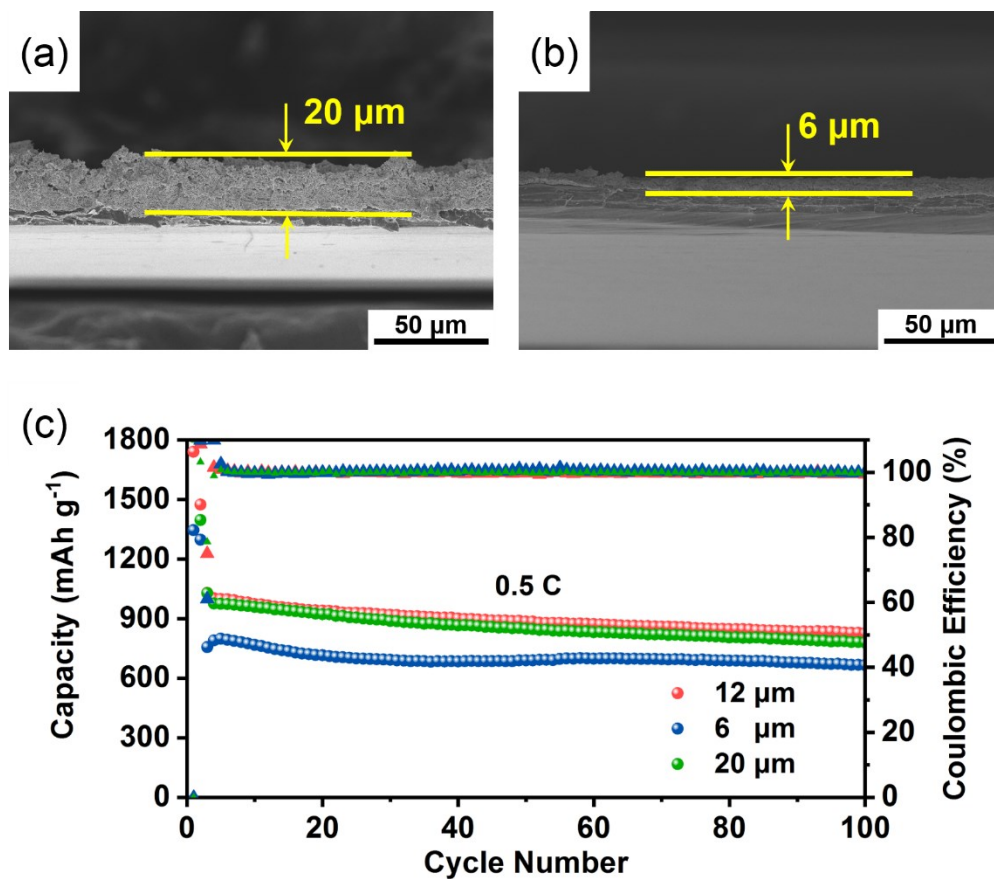

**Figure S14.** (a),(b) SEM images of ZnS@WCF coated separator with different thickness; (c) Cycling performance of

LS-ZnS@WCF based on different interlayer thickness at 0.5 C.

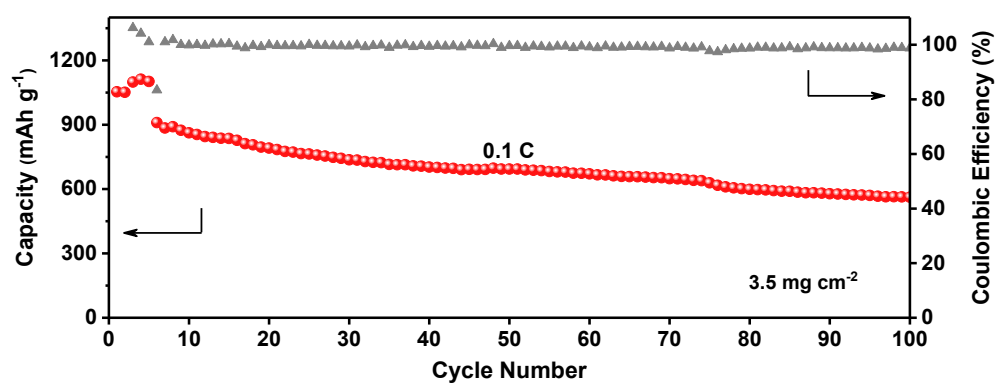

**Figure S15.** Cycling performance of LS-ZnS@WCF with a high areal sulfur loading of  $3.5 \text{ mg} \cdot \text{cm}^{-2}$  at 0.1 C.

**Table S2.** Comparison of electrochemical performances of the other hybrid interlayer materials in recent reported literatures.

| Materials                        | Current density | Cycle number | Capacity decay rate (%) | Rate performance             | Ref       |
|----------------------------------|-----------------|--------------|-------------------------|------------------------------|-----------|
| <b>SnO<sub>2</sub>-rGO</b>       | 1 C             | 200          | 0.15                    | 734 mAh g <sup>-1</sup> , 2C | 17        |
| <b>Laponite-CB</b>               | 0.2 C           | 500          | 0.06                    | 758 mAh g <sup>-1</sup> , 2C | [S3]      |
| <b>MoO<sub>3</sub>-CNTs</b>      | 1 C             | 400          | 0.12                    | 764 mAh g <sup>-1</sup> , 2C | [S4]      |
| <b>Co/mSiO<sub>2</sub>-NCNTs</b> | 1 C             | 250          | 0.09                    | 552 mAh g <sup>-1</sup> , 5C | [S5]      |
| <b>HEMO-KB</b>                   | 0.5 C           | 600          | 0.077                   | 634 mAh g <sup>-1</sup> , 1C | [S6]      |
| <b>PDA-rGO</b>                   | 0.1             | 100          | 0.28                    | 460 mAh g <sup>-1</sup> , 2C | [S7]      |
| <b>ZnS@WCF</b>                   | 1 C             | 600          | 0.045                   | 807 mAh g <sup>-1</sup> , 2C | This work |

## References

- [1] J. Wang, J. Polleux, J. Lim and B. Dunn, J. Phys. Chem. C, 2007, 111, 14925–14931.
- [2] X. H. Rui, N. Yesibolati, S. R. Li, C. C. Yuan and C. H. Chen, Solid State Ionics, 2011, 187, 58–63.
- [3] Y. Yang, J. Zhang, Adv. Energy Mater. 8 (2018) 1801778.
- [4] L. Luo, X. Qin, J. Wu, G. Liang, Q. Li, M. Liu, F. Kang, G. Chen, B. Li, J. Mater. Chem. A. 6 (2018) 8612-8619.
- [5] D. Fang, Y. Wang, X. Liu, J. Yu, C. Qian, S. Chen, X. Wang, S. Zhang, ACS Nano 13 (2019) 1563-1573.
- [6] Y. Zheng, Y. Yi, M. Fan, H. Liu, X. Li, R. Zhang, M. Li, Z.-A. Qiao, Energy Storage Mater. (2019).
- [7] F. Wu, S. Zhao, J. Li, Y. Lu, Y. Su, L. Chen, L. Bao, J. Yao, X. Liu, ACS Appl. Mater. Interfaces 11 (2019) 12544-12553.
